# Supplementary material for: Expression of the Arabidopsis thaliana BBX32 Gene in Soybean Increases Grain Yield
Source: PLoS One. 2012 Feb 17;7(2):e30717. doi: 10.1371/journal.pone.0030717 (PMC3281879; doi:10.1371/journal.pone.0030717)
Supplement: Table S1 — Gene expression data for overexpression and miRNA targets described in this manuscript. (XLSX) [file pone.0030717.s004.xlsx]

## Sheet: expression levels
	Supplementary Table 1
Event #	EVENT Name	Type	Construct	Name	expression level (Log2)	Standard Deviation
1	GM_A182981	overexpression	pMON108080	GmBBX52	17.8544	0.488344
2	GM_A182984	overexpression	pMON108080	GmBBX52	16.6914	0.364469
3	GM_A182985	overexpression	pMON108080	GmBBX52	17.8966	0.910977
4	GM_A182987	overexpression	pMON108080	GmBBX52	17.0703	0.480383
5	GM_A182994	overexpression	pMON108080	GmBBX52	18.124	1.19007
6	GM_A183003	overexpression	pMON108080	GmBBX52	19.1583	1.07836
7	GM_A183004	overexpression	pMON108080	GmBBX52	16.9394	1.32287
8	GM_A183008	overexpression	pMON108080	GmBBX52	16.6509	0.788927
1	GM_A104181	overexpression	pMON98939	GmBBX53	21.0498	0.366031
2	GM_A104185	overexpression	pMON98939	GmBBX53	20.7526	0.302363
3	GM_A104189	overexpression	pMON98939	GmBBX53	20.607	0.325124
4	GM_A104227	overexpression	pMON98939	GmBBX53	20.4764	0.770059
1	GM_A41178	overexpression	pMON81312	AtBBX32	20.86	0.53
2	GM_A41189	overexpression	pMON81312	AtBBX32	21.15	0.21
3	GM_A41200	overexpression	pMON81312	AtBBX32	20.67	0.11
4	GM_A41206	overexpression	pMON81312	AtBBX32	undetected	n/a
5	GM_A41209	overexpression	pMON81312	AtBBX32	21.07	0.15
6	GM_A41213	overexpression	pMON81312	AtBBX32	21.11	0.15
7	GM_A41217	overexpression	pMON81312	AtBBX32	20.972	0.25
8	GM_A41218	overexpression	pMON81312	AtBBX32	21.16	0.1
Event #	EVENT Name	Type	Construct	Name	GmBBX52 average (Log2)	GmBBX52 Stdev	sig lower than WT	GmBBX53 average (Log2)	GmBBX53 Stdev	sig lower than WT
	A3525	wt control		wt	10.3119	0.25917		9.91943	0.375407
1	GM_A220263	miRNA	pMON93914	BBX52/53 miRNA	9.57	0.43	yes	10.17	0.2	no
2	GM_A220280	miRNA	pMON93914	BBX52/53 miRNA	9.86054	0.377877	no	10.5302	0.248515	no
3	GM_A220355	miRNA	pMON93914	BBX52/53 miRNA	9.83165	0.636447	yes	10.118	0.395963	no
4	GM_A220348	miRNA	pMON93914	BBX52/53 miRNA	9.706	0.433309	yes	10.3944	0.628612	no
5	GM_A220403	miRNA	pMON93914	BBX52/53 miRNA	9.26634	0.312462	yes	9.95751	0.248722	no
6	GM_A220306	miRNA	pMON93914	BBX52/53 miRNA	9.46448	0.54284	yes	10.1481	0.21646	no
7	GM_A220389	miRNA	pMON93914	BBX52/53 miRNA	9.26634	0.312462	yes	9.95751	0.248722	no
8	GM_A220365	miRNA	pMON93914	BBX52/53 miRNA	9.14194	0.893636	yes	10.2148	0.709107	no
